# Supplementary material for: Impact of Polypharmacy for Chronic Ailments in Colon Cancer Patients: A Review Focused on Drug Repurposing
Source: PubMed Central journal article supplement (PMC7598185; doi:10.3390/cancers12102724), 2020-09-23
Supplement: cancers-12-02724-s001.pdf [file cancers-12-02724-s001.pdf]

## Supplementary Materials:

# Impact of Polypharmacy for Chronic Ailments in Colon Cancer Patients: A Review Focused on Drug Repurposing

Riccardo Giampieri \*, Luca Cantini, Enrica Giglio, Alessandro Bittoni, Andrea Lanese, Sonia Crocetti, Federica Pecci, Cecilia Copparoni, Tania Meletani, Edoardo Lenci, Alessio Lupi, Maria Giuditta Baleani and Rossana Berardi

Table S1. Summary of studies for drugs cited in the review, listed by effect on colorectal cancer incidence.

| Drugs                | Number of Patients | Results Favouring Drug | Results Not Favouring Drug                                                                           | Results Against Drug           | Citation No.       |
|----------------------|--------------------|------------------------|------------------------------------------------------------------------------------------------------|--------------------------------|--------------------|
| ALL antihypertensive | 324,168            | /                      | No difference in cancer incidence in users vs. not.                                                  | ACEi + ARB<br>10% RR increase. | Bangalore [9]      |
| ARB/A CEi vs. others | 138,769            | /                      | No difference in CRC risk between ARB users vs. other                                                | /                              | ARB trialists [10] |
| ARB users vs. others | 111,533            | /                      | No difference in CRC risk between ARB users vs. other.<br>No difference for short- or long-term use. | /                              | Htoo [11]          |

|                                |                                       |                                                                       |                                                                         |                                  |               |
|--------------------------------|---------------------------------------|-----------------------------------------------------------------------|-------------------------------------------------------------------------|----------------------------------|---------------|
| CCBs users vs. others          | 23,167                                | /                                                                     | No difference in CRC risk between CCBs vs. other.                       | /                                | Sorensen [12] |
| ALL antihypertensive           | 11,697 + 10× controls                 | /                                                                     | No difference in CRC risk between users vs. not.                        | /                                | Assimes [13]  |
| SSRI vs. others TCA vs. others | 6544 for tricyclic<br>3367 for SSRI   | SSRI users decreased risk of CRC                                      | No difference in CRC risk between TCA users vs. other                   | /                                | Xu [69]       |
| SSRI vs. others TCA vs. others | 10,011 for tricyclic<br>2484 for SSRI | SSRI users decreased risk of CRC                                      | No difference in CRC risk between TCA users vs. other                   | /                                | Coogan [70]   |
| SSRI vs. others TCA vs. others | 649 (+656 controls)                   | SSRI users decreased risk of CRC<br>TCA users decreased risk of CRC   | /                                                                       | /                                | Chubak [71]   |
| TCA vs. others                 | 31,953 + 2× controls                  | TCA users had decreased risk of CRC<br>The effect was cancer-specific | No difference in risk of other cancer types (lung, breast and prostate) | /                                | Walker [72]   |
| ALL antidepressants            | 49,342 + 240,985 controls             | Mirtazapine users decreased risk of CRC                               | /                                                                       | MAOI users increased risk of CRC | Lee [74]      |

|                                                             |                                                                                                |                                                            |                                                 |                                                                 |                         |
|-------------------------------------------------------------|------------------------------------------------------------------------------------------------|------------------------------------------------------------|-------------------------------------------------|-----------------------------------------------------------------|-------------------------|
| ALL antidepressants                                         | 9979 + 99,790 controls                                                                         | /                                                          | No difference in CRC risk between users vs. not | /                                                               | Cronin-Fenton [75]      |
| ALL antidepressants                                         | 418,588 + 1× controls                                                                          | /                                                          | /                                               | Small (not statistically significant) increased risk of CRC     | Haukka [76]             |
| ALL antidepressants                                         | 109,096 + 426,402 controls                                                                     | /                                                          | No difference in CRC risk between users vs. not | Increased risk of lung and breast cancer for SSRI and TCA users | Boursi [77]             |
| ALL antidepressants                                         | 2580 + 142,610 controls                                                                        | Severe depressive symptoms associated with 20% risk of CRC | No difference in CRC risk between users vs. not | /                                                               | Kiridly-Calderbank [78] |
| Statins vs. nonusers                                        | 1953 cases + 2015 healthy controls                                                             | Statin users decreased risk of CRC                         | /                                               | /                                                               | Poynter [97]            |
| Statins vs. nonusers                                        | 3244 cases + 14,844 controls                                                                   | /                                                          | No difference in CRC risk between users vs. not | /                                                               | Kaye [98]               |
| Statins vs. nonusers or users of other lipid-lowering drugs | 12,251 statin users + 1257 users of other lipid-lowering drugs (population-based cohort study) | /                                                          | No difference in CRC risk between users vs. not | /                                                               | Friis [99]              |

|                                                                    |                                                                |                                                                                 |                                                                              |   |                       |
|--------------------------------------------------------------------|----------------------------------------------------------------|---------------------------------------------------------------------------------|------------------------------------------------------------------------------|---|-----------------------|
| HMG-CoA reductase inhibitors vs. users of bile acid-binding resins | 542 cases + 5420 controls                                      | /                                                                               | No difference in CRC risk between HMG-CoA reductase inhibitors users vs. not | / | Blais [100]           |
| Statins vs. nonusers                                               | Meta-analysis of 18 studies                                    | Modest reduction in CRC risk among case-control studies                         | No difference in CRC risk among RCTs and cohort studies                      | / | Bonovas [101]         |
| Statins vs. nonusers                                               | Meta-analysis of 42 studies                                    | Modest reduction in CRC risk                                                    | /                                                                            | / | Liu [102]             |
| Statins vs. nonusers                                               | Meta-analysis of 40 studies                                    | Modest reduction in CRC risk among case-control and cohort studies              | No difference in CRC risk among RCTs                                         | / | Lytras [103]          |
| Statins vs. nonusers                                               | 15,558 statin users + 75,597 nonusers (cohort study)           | Reduction in the risk of rectal cancer                                          | No difference in overall CRC risk between users vs. not                      | / | Lee [104]             |
| Statins vs. nonusers (non-elderly population)                      | 32,616 cases + 325,086 controls                                | Stronger effect of statins on CRC risk in participants aged 55 years or younger | /                                                                            | / | Sehdev [105]          |
| Statins vs. nonusers (patients with inflammatory bowel disease)    | 11,001 patients with inflammatory bowel disease (cohort study) | Reduction in CRC risk                                                           | /                                                                            | / | Ananthakrishnan [106] |

|                                                      |                                                         |                                                                              |                                                         |                                                                                                      |                   |
|------------------------------------------------------|---------------------------------------------------------|------------------------------------------------------------------------------|---------------------------------------------------------|------------------------------------------------------------------------------------------------------|-------------------|
| Statins vs. nonusers                                 | 25,811 cases + 129,117 controls                         | Reduction in the risk of rectal cancer                                       | No difference in overall CRC risk between users vs. not | /                                                                                                    | Ibáñez-Sanz [107] |
| ALL antibiotics                                      | 25 observational studies (n = 7,947,270 patients)       | /                                                                            | /                                                       | 18% higher risk of cancer in antibiotics users (small increase in risk in CRC)                       | Petrelli [45]     |
| ALL antibiotics                                      | 4029 cases and 15988 controls                           | /                                                                            | /                                                       | Increase in CRC risk with penicillin and quinolone                                                   | Dik [53]          |
| Oral antibiotics vs. not users                       | 28,980 CRC cases and 137,077 controls identified        | Decrease in rectal cancer risk with tetracyclines                            | /                                                       | Increase in colon cancer risk with penicillin and ampicillin/amoxicillin                             | Zhang [54]        |
| Oral insulin secretagogues and insulin vs. not users | 8194 incident cancer cases and 32,776 diabetic controls | /                                                                            | /                                                       | Sulfonylureas and glinides increased the risk for overall cancer but to a lesser extent than insulin | Chang [81]        |
| Metformin vs. not users                              | 151 patients randomised                                 | Reduced the prevalence and number of metacronous polyps                      | /                                                       | /                                                                                                    | Higurashi [84]    |
| ASA vs. not users                                    | Review                                                  | Chemoprotective properties in CRC                                            | /                                                       | Side effects                                                                                         | Lee [24]          |
| NSAIDs vs. not users                                 | Review                                                  | Protective effects on intestinal tumours                                     | /                                                       | /                                                                                                    | Couturier [25]    |
| ASA vs. not users                                    | Review                                                  | Protective effects on CRC PIK3CA-mutated patients                            | /                                                       | /                                                                                                    | Grancher [26]     |
| ASA vs. not users                                    | Review                                                  | Beneficial effect against some types of cancer, particularly of the GI tract | /                                                       | /                                                                                                    | Santilli [30]     |

|                              |                                         |                                                               |   |                      |              |
|------------------------------|-----------------------------------------|---------------------------------------------------------------|---|----------------------|--------------|
| Salicylic acid vs. not users |                                         | Reduction of incidence and mortality of CRC                   | / | /                    | Ai [31]      |
| ASA vs. not users            | Review                                  | Reduction of long-term risk of some cancers, particularly CRC | / | /                    | Dovizio [32] |
| ASA vs. not users            | Review                                  | Reduction of risk of CRC and recurrence of adenomatous polyps | / | ASA-induced bleeding | Thun [33]    |
| ASA and NA-NSAIDs            | Meta-analysis of 23 studies (1,000,000) | Chemoprevention of CRC                                        | / | /                    | Tomić [39]   |
